# Supplementary material for: Infrapatellar fat pad-derived MSC response to inflammation and fibrosis induces an immunomodulatory phenotype involving CD10-mediated Substance P degradation
Source: PubMed Central journal article supplement (PMC6659713; doi:10.1038/s41598-019-47391-2), 2019-07-26
Supplement: 41598_2019_47391_MOESM1_ESM.pdf [file 41598_2019_47391_MOESM1_ESM.pdf]

**Infrapatellar fat pad-derived MSC response to inflammation and fibrosis induces an immunomodulatory phenotype involving CD10-mediated Substance P degradation**

Dimitrios Kouroupis,<sup>1,2</sup> Annie Bowles,<sup>1,2,3</sup> Melissa Willman,<sup>2</sup> Carlotta Perucca Orfei,<sup>4</sup> Alessandra Colombini,<sup>4</sup> Thomas Best,<sup>1</sup> Lee Kaplan,<sup>1</sup> and Diego Correa,<sup>\*1,2</sup>

**Supplementary Table S1:** Selected pathways and proteins involved post-TI and TIC priming. Related to Figure 4.

**IFP-MSC naïve vs TI**

| PATHWAYS                 | PROTEINS                                      |
|--------------------------|-----------------------------------------------|
| MAPK signaling           | FLT4 IGF1R TGFA FIGF IGF1 AREG NTF3 TNF NTF4  |
| PI3K-Akt signaling       | FLT4 IGF1R TGFA FIGF IGF1 IL6R AREG NTF3 NTF4 |
| Ras signaling            | FLT4 IGF1R TGFA FIGF IGF1 NTF3 NTF4           |
| IL-10 signaling          | ICAM1 CXCL10 CXCL8 TNFRSF1B TNF CCL5          |
| IL-4 and IL-13 signaling | ICAM1 CXCL8 IL6R TNFRSF1B TNF                 |
| TNF signaling            | ICAM1 CXCL10 TNFRSF1B TNF CCL5                |
| Rheumatoid arthritis     | IFNG ICAM1 CXCL8 TNF CCL5                     |

**IFP-MSC naïve vs TIC**

| PATHWAYS                 | PROTEINS                                       |
|--------------------------|------------------------------------------------|
| MAPK signaling           | FGF4 FGF2 EGF IGF1R CSF1 NGF AREG TNF          |
| IL-10 signaling          | ICAM1 CSF2 CXCL10 CXCL8 CSF1 TNFRSF1B TNF CCL5 |
| TNF signaling            | ICAM1 CSF2 CXCL10 CSF1 TNFRSF1B TNF CCL5       |
| PI3K-Akt signaling       | FGF4 FGF2 EGF IGF1R CSF1 NGF AREG              |
| Rheumatoid arthritis     | IFNG ICAM1 CSF2 CXCL8 CSF1 TNF CCL5            |
| Ras signaling            | FGF4 FGF2 EGF IGF1R CSF1 NGF                   |
| IL-4 and IL-13 signaling | FGF2 ICAM1 CXCL8 TNFRSF1B TNF                  |

**BM-MSC naïve vs TI**

| PATHWAYS             | PROTEINS                           |
|----------------------|------------------------------------|
| MAPK signaling       | HGF EGFR PDGFA TGFB2 AREG TNF NTF4 |
| PI3K-Akt signaling   | HGF CSF3 EGFR PDGFA AREG NTF4      |
| IL-10 signaling      | CSF3 ICAM1 CXCL10 TNF CCL5         |
| Rheumatoid arthritis | IFNG ICAM1 TGFB2 TNF CCL5          |
| TNF signaling        | ICAM1 CXCL10 TNF CCL5              |

**BM-MSC naïve vs TIC**

| PATHWAYS                         | PROTEINS                                          |
|----------------------------------|---------------------------------------------------|
| Regulation of actin cytoskeleton | FGF4 FGF6 PDGFRA PDGFRB FGF2 EGF EGFR PDGFB PDGFA |
| IL-10 signaling                  | CSF3 CCL2 ICAM1 CSF2 CXCL10 CSF1 IL6 TNF CCL5     |
| TNF signaling                    | CCL2 ICAM1 CSF2 CXCL10 CSF1 IL6 TNF CCL5          |

**Supplementary Table S2.** List of Antibodies. Related to Figures 2, 5, and 6.

| ANTIBODY          | CLONE      | CONCENTRATION | CAT#        | MANUFACTURER    |
|-------------------|------------|---------------|-------------|-----------------|
| CD10-APC          | HI10a      | 5ul undiluted | 312210      | Biolegend       |
| CD44-BV605        | IM7        | 5ul undiluted | 103047      | Biolegend       |
| CD56-FITC         | HCD56      | 5ul undiluted | 318304      | Biolegend       |
| CD73-APC          | AD2        | 5ul undiluted | 344006      | Biolegend       |
| CD90-FITC         | 5E10       | 5ul undiluted | 328108      | Biolegend       |
| CD105-PE          | SN6h       | 5ul undiluted | 800504      | Biolegend       |
| CD146-PE          | 541-10B2   | 5ul undiluted | 130-092-853 | Miltenyi Biotec |
| CD166-BV786       | 3A6        | 5ul undiluted | 564939      | BD Biosciences  |
| CD200-FITC        | OX104      | 5ul undiluted | 11-9200-42  | Invitrogen      |
| CD271-PECF594     | C40-1457   | 5ul undiluted | 563452      | BD Biosciences  |
| NG2-AlexaFluor647 | 9.2.27     | 5ul undiluted | 562414      | BD Biosciences  |
| LepR-PE-Vio770    | REA361     | 5ul undiluted | 130-105-153 | Miltenyi Biotec |
| CXCR4-APC         | 12G5       | 5ul undiluted | 17-9999-42  | Invitrogen      |
| Anti-CD10         | Polyclonal | 1:20 diluted  | AF1182      | R & D Systems   |
| Anti-Substance P  | Polyclonal | 1:100 diluted | AB1566      | Millipore       |
| Anti-mitochondria | 113-1      | 1:150 diluted | MAB1273     | Millipore       |

**Supplementary Table S3.** List of transcripts and primers. Related to Figure 3.

| TRANSCRIPT NAME              | PRIMERS                                                                                            |
|------------------------------|----------------------------------------------------------------------------------------------------|
| <i>IDO</i>                   | Forward: <i>AGA GTC AAA TCC CTC AGT CC</i><br>Reverse: <i>AAA TCA GTG CCT CCA GTT CC</i>           |
| <i>IL-6</i>                  | Forward: <i>GTA GCC GCC CCA CAC AGA CAG CC</i><br>Reverse: <i>GCC ATC TTT GGA AGG TTC</i>          |
| <i>IL-8</i>                  | Forward: <i>GAA CTG AGA GTG ATT GAG AGT</i><br>Reverse: <i>CTT CTC CAC AAC CCT CTG</i>             |
| <i>CD10</i>                  | Forward: <i>CTG TGG GAT GAG GAG GTT AAA G</i><br>Reverse: <i>GGA GGC TAA AGC AGG AGA ATA G</i>     |
| <i>ICAM-1</i>                | Forward: <i>AGG AGG TGG TAA GAG AGA AGA G</i><br>Reverse: <i>TAA GGG TGG GAG GAG GAT TT</i>        |
| <i>G-CSF</i>                 | Forward: <i>AGC TTC CTG CTC AAG TGC</i><br>Reverse: <i>TTC TTC CAT CTG CTG CCA GAT GGT</i>         |
| <i>HGF</i>                   | Forward: <i>ATG TGG GTG ACC AAA CTC CTG</i><br>Reverse: <i>CTA TTG AAG GGG AAC CAG AGG</i>         |
| <i>IGF-1</i>                 | Forward: <i>TCT TGA AGG TGA AGA TGC ACA CCA</i><br>Reverse: <i>AGC GAG CTG ACT TGG CAG GCT TGA</i> |
| <i>IL-10</i>                 | Forward: <i>GCC TAA CAT GCT TCG AGA TC</i><br>Reverse: <i>TGA TGT CTG GGT CTT GGT TC</i>           |
| <i>TGF<math>\beta</math></i> | Forward: <i>CAG CAA CAA TTC CTG GCG ATA</i><br>Reverse: <i>AAG GCG AAA GCC CTC AAT TT</i>          |
| <i>HLA-G</i>                 | Forward: <i>GCT GCT GTG CTG TGG AGA A</i><br>Reverse: <i>TCT GGA ACA GGA AAG GTG ATT GG</i>        |
| <i>PTGES2</i>                | Forward: <i>CCT GGA AGA GAT CAT CAC C</i><br>Reverse: <i>CCT TCT CGT TGA GCA TGA</i>               |
| <i>GAPDH</i>                 | Forward: <i>TAC GTC GTG GAG TCC ACT GG</i><br>Reverse: <i>GCC AAC GTG TCA GTG GTG GA</i>           |
